# Supplementary material
Source: Elsevier journal article supplement (https://www.sciencedirect.com/science/article/pii/S0213911123000031)
Supplement: mmc1 [file S0213911123000031:mmc1.doc]

**Apéndice**

**Tabla I**

Evolución de las solicitudes, resoluciones y listas de espera del SAAD desde 2015

| **Año** | **Solicitudes** | **Resoluciones** | | **Beneficiarios** | | |  | |
| --- | --- | --- | --- | --- | --- | --- | --- | --- |
| **Resoluciones con grado** | **Sin grado** | **Con derecho a prestación** | **Con prestación (atendidas)** | **Con derecho reconocido pendientes de prestación** | **Pendientes de evaluar** | **Total**  **en espera** |
| 2015 | 1.610.714 | 1.504.550 | 324.115 | 1.180.435 | 796.109 | 384.326 | 106.164 | 490.490 |
| 2016 | 1.622.203 | 1.518.965 | 305.092 | 1.213.873 | 865.564 | 348.309 | 103.238 | 451.547 |
| 2017 | 1.711.379 | 1.591.166 | 326.215 | 1.264.951 | 954.831 | 310.120 | 120.213 | 430.333 |
| 2018 | 1.767.186 | 1.638.618 | 334.306 | 1.304.312 | 1.054.275 | 250.037 | 128.568 | 378.605 |
| 2019 | 1.894.744 | 1.735.551 | 350.514 | 1.385.037 | 1.115.183 | 269.854 | 159.193 | 429.047 |
| 2020 | 1.850.950 | 1.709.394 | 352.921 | 1.356.473 | 1.124.230 | 232.243 | 141.556 | 373.799 |
| 2021 | 1.892.704 | 1.768.008 | 352.430 | 1.415.578 | 1.222.142 | 193.436 | 124.696 | 318.132 |
|  |  |  |  |  |  |  |  |  |

Fuente: elaboración propia a partir de informes del SISAAD del Ministerio de Derechos Sociales y Agenda 2030. IMSERSO3.

**Tabla II**

Tendencia e importancia del tipo de prestaciones desde 2015

|  |  | **Prestaciones** | | | | | | | | |
| --- | --- | --- | --- | --- | --- | --- | --- | --- | --- | --- |
|  | **Beneficiarios con prestaciones** | **Prestaciones de servicio** | | | | | **Prestaciones económicas** | | | **Ratio medio de prestaciones por persona** |
|  | **Prevención y promoción autonomía personal** | **Teleasistencia** | **Ayuda a domicilio** | **Centros de día/noche** | **Atención residencial** | **Vinculada a servicio** | **Cuidados familiares** | **Asistencia personal** |
|  | **%** | **%** | **%** | **%** | **%** | **%** | **%** | **%** | **%** | **%** |
|  |  |  |  |  |  |  |  |  |  |  |
| Incremento medio anual | 7,46 | 5,46 | 4,85 | 3,89 | −5,95 | −5,11 | 4,47 | −2,59 | 9,66 | 1,28 |
| Promedio sobre total de prestaciones | n.a. | 3,86 | 16,60 | 17,03 | 7,18 | 12,70 | 9,82 | 32,29 | 0,52 | 1,26 |
| Fuente: elaboración propia a partir de informes del SISAAD a cierre de ejercicios, desde 2015 a 2021. IMSERSO3. | | | | | | | | | |  |

**Tabla III**

Evolución del número de prestaciones desde 2015

|  |  | **Prestaciones** | | | | | | | | |
| --- | --- | --- | --- | --- | --- | --- | --- | --- | --- | --- |
|  | **Beneficiarios con prestaciones** | **Prestaciones de servicio** | | | | | **Prestaciones económicas** | | | **Total/prestaciones** |
|  | **Prevención y promoción autonomía personal** | **Teleasistencia** | **Ayuda a domicilio** | **Centros de día/noche** | **Atención residencial** | **Vinculada a servicio** | **Cuidados familiares** | **Asistencia personal** |
| **Año** | **N.º** | **N.º** | **N.º** | **N.º** | **N.º** | **N.º** | **N.º** | **N.º** | **N.º** | **N.º** |
| 2015 | 796.109 | 29.461 | 140.252 | 147.748 | 84.462 | 148.382 | 83.734 | 360.505 | 3.440 | 997.984 |
| 2016 | 865.564 | 38.854 | 164.136 | 170.693 | 85.730 | 151.719 | 90.847 | 361.209 | 5.779 | 1.068.967 |
| 2017 | 954.831 | 46.078 | 186.276 | 194.725 | 90.959 | 157.174 | 110.669 | 385.476 | 6.654 | 1.178.011 |
| 2018 | 1.054.275 | 52.274 | 224.714 | 235.924 | 94.802 | 166.579 | 132.491 | 406.849 | 7.026 | 1.320.659 |
| 2019 | 1.115.183 | 60.438 | 246.617 | 250.318 | 96.748 | 170.785 | 151.340 | 426.938 | 7.837 | 1.411.021 |
| 2020 | 1.124.230 | 61.411 | 254.644 | 253.202 | 88.465 | 156.437 | 154.547 | 450.517 | 7.984 | 1.427.207 |
| 2021 | 1.222.142 | 62.214 | 292.469 | 291.129 | 91.795 | 169.990 | 170.517 | 482.545 | 8.546 | 1.569.205 |

Fuente: elaboración propia a partir de Informes del SISAAD del Ministerio de Derechos Sociales y Agenda 2030. IMSERSO3.

**Tabla IV**

Impacto del Plan de Choque en Dependencia en el año 2023 en producción, valor añadido bruto (millones de €) y empleo (tiempo completo equivalente)

|  | **Impacto en Producción** | | | | **Impacto en valor añadido bruto** | | | | **Impacto en empleo** | | | |
| --- | --- | --- | --- | --- | --- | --- | --- | --- | --- | --- | --- | --- |
|  | **Directo**  **+ indirecto** | **Inducido** | **Total** | **Directo**  **+ indirecto** | | **Inducido** | **Total** | **Directo**  **+ indirecto** | | **Inducido** | **Total** |
| Agricultura, ganadería, silvicultura y pesca | 151 | 714 | 865 | 66 | | 311 | 376 | 1.622 | | 7,693 | 9.315 |
| Industrias extractivas | 128 | 335 | 463 | 7 | | 18 | 24 | 97 | | 255 | 353 |
| Productos alimenticios, bebidas, tabaco manufacturado | 661 | 2.323 | 2.984 | 102 | | 358 | 460 | 1.434 | | 5,038 | 6.471 |
| Productos textiles, prendas de vestir, artículos de cuero y calzado | 132 | 444 | 576 | 14 | | 46 | 60 | 324 | | 1.092 | 1.416 |
| Madera, papel, servicios de impresión y reproducción | 165 | 231 | 396 | 39 | | 54 | 93 | 682 | | 955 | 1.637 |
| Coque y productos de refino de petróleo | 103 | 388 | 492 | 4 | | 15 | 19 | 50 | | 186 | 236 |
| Productos químicos | 329 | 383 | 712 | 44 | | 51 | 95 | 511 | | 595 | 1.105 |
| Productos farmacéuticos de base y sus preparados | 78 | 167 | 245 | 12 | | 25 | 37 | 81 | | 174 | 255 |
| Productos de caucho y plásticos | 92 | 130 | 222 | 17 | | 24 | 42 | 306 | | 436 | 743 |
| Otros productos minerales no metálicos | 70 | 66 | 137 | 19 | | 18 | 36 | 263 | | 248 | 511 |
| Productos de metalurgia y productos metálicos | 74 | 119 | 192 | 10 | | 17 | 27 | 95 | | 152 | 247 |
| Productos metálicos, excepto maquinaria y equipo | 68 | 129 | 198 | 15 | | 29 | 44 | 565 | | 1.071 | 1.636 |
| Productos informáticos, electrónicos y ópticos | 125 | 115 | 239 | 9 | | 8 | 17 | 267 | | 246 | 513 |
| Equipo eléctrico | 66 | 113 | 179 | 9 | | 15 | 24 | 57 | | 97 | 154 |
| Maquinaria y equipo n.c.o.p. | 42 | 73 | 115 | 8 | | 13 | 21 | 183 | | 318 | 501 |
| Vehículos de motor, material de transporte | 43 | 346 | 389 | 4 | | 36 | 40 | 73 | | 596 | 669 |
| Muebles, otros productos manufacturados | 148 | 161 | 309 | 32 | | 35 | 67 | 434 | | 474 | 908 |
| Servicios de reparación e instalación de maquinaria y equipos | 77 | 95 | 173 | 42 | | 52 | 94 | 411 | | 505 | 916 |
| Energía eléctrica, gas, vapor y aire acondicionado | 495 | 978 | 1.473 | 153 | | 301 | 454 | 270 | | 533 | 802 |
| Agua y servicios asociados | 181 | 253 | 434 | 64 | | 90 | 155 | 913 | | 1.278 | 2.191 |
| Construcciones y trabajos de construcción | 764 | 401 | 1.165 | 301 | | 158 | 459 | 5.371 | | 2.821 | 8.192 |
| Comercio y reparación de vehículos | 967 | 2.472 | 3.439 | 535 | | 1.368 | 1.903 | 14.517 | | 37.110 | 51.627 |
| Servicios de transporte, correos y mensajería | 541 | 1.093 | 1.633 | 224 | | 453 | 678 | 3.631 | | 7.335 | 10.965 |
| Servicios de alojamiento, y de comidas y bebidas | 186 | 2.138 | 2.323 | 106 | | 1.224 | 1.330 | 1.980 | | 22.792 | 24.772 |
| Servicios de edición, cine, vídeo y televisión | 129 | 143 | 272 | 45 | | 50 | 95 | 480 | | 534 | 1.014 |
| Servicios de telecomunicaciones | 197 | 399 | 596 | 91 | | 184 | 275 | 430 | | 872 | 1.303 |
| Servicios de programación, consultoría, informática, información | 118 | 71 | 189 | 56 | | 34 | 90 | 859 | | 516 | 1.375 |
| Servicios financieros, excepto seguros y fondos de pensiones | 225 | 478 | 703 | 133 | | 281 | 414 | 1.101 | | 2.337 | 3.438 |
| Servicios de seguros, reaseguros y planes de pensiones | 72 | 282 | 354 | 24 | | 93 | 117 | 201 | | 782 | 983 |
| Servicios auxiliares a los servicios financieros y de seguros | 46 | 268 | 314 | 27 | | 158 | 186 | 270 | | 1.568 | 1.838 |
| Servicios inmobiliarios | 249 | 2.740 | 2.988 | 214 | | 2.360 | 2.574 | 336 | | 3.701 | 4.037 |
| Servicios profesionales, científicos y técnicos | 527 | 675 | 1.201 | 283 | | 363 | 647 | 4.974 | | 6.370 | 11.343 |
| Servicios de alquiler, empleo y agencias de viajes | 135 | 389 | 524 | 54 | | 156 | 210 | 1.075 | | 3.090 | 4.165 |
| Servicios de ayuda a las empresas | 517 | 403 | 920 | 316 | | 246 | 561 | 10.080 | | 7.844 | 17.924 |
| Servicios de administración pública | 13 | 33 | 46 | 9 | | 24 | 33 | 203 | | 528 | 732 |
| Servicios de educación | 140 | 332 | 472 | 122 | | 287 | 409 | 2.615 | | 6.179 | 8.793 |
| Servicios de atención sanitaria | 227 | 396 | 623 | 140 | | 245 | 385 | 2.497 | | 4.355 | 6.852 |
| Servicios sociales | 11.618 | 150 | 11.767 | 7.555 | | 97 | 7.653 | 218.840 | | 2.823 | 221.663 |
| Servicios recreativos y entretenimiento | 61 | 440 | 501 | 34 | | 247 | 281 | 874 | | 6.281 | 7.155 |
| Servicios de asociaciones, reparación y otros servicios personales | 161 | 325 | 486 | 101 | | 203 | 304 | 3.709 | | 7.466 | 11.175 |
| Servicios de los hogares | 58 | 199 | 257 | 58 | | 199 | 257 | 2.350 | | 8.043 | 10.393 |
| Total | 20.179 | 21.391 | 41.570 | 11.098 | | 9.948 | 21.046 | 285.030 | | 155.290 | 440.319 |
